# Supplementary material for: Click chemistry based synthesis, cytotoxic activity and molecular docking of novel triazole-thienopyrimidine hybrid glycosides targeting EGFR
Source: PubMed Central journal article supplement (PMC8759726; doi:10.1080/14756366.2020.1871335), 2021-01-28

**Click Chemistry based Synthesis, Cytotoxic Activity and  
Molecular Docking of Novel Triazole-Thienopyrimidine  
Hybrid Glycosides Targeting EGFR**

**Supplementary File**



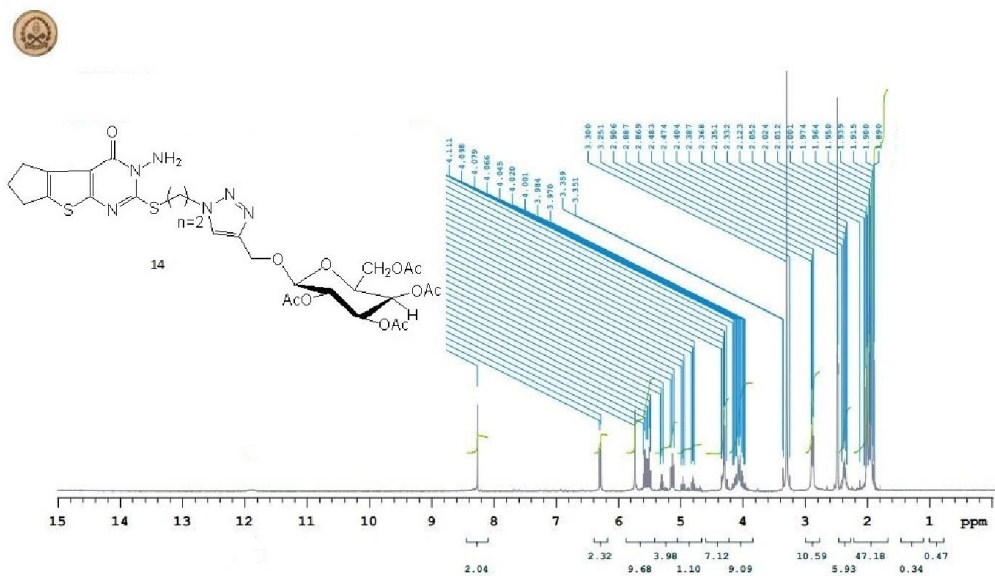

Fig 3: <sup>1</sup>H NMR of Compound 14

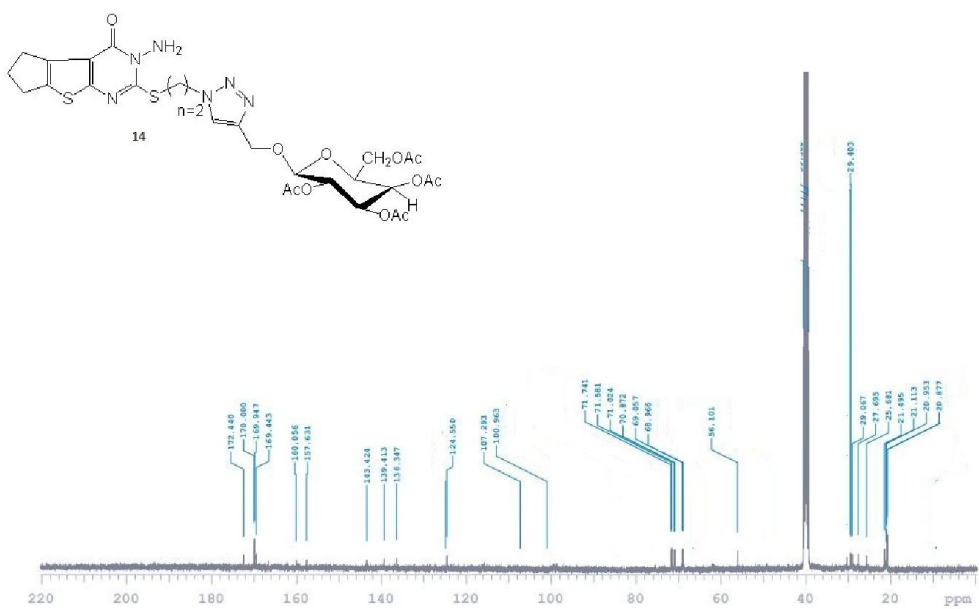

Fig 4: <sup>13</sup>C NMR of Compound 14

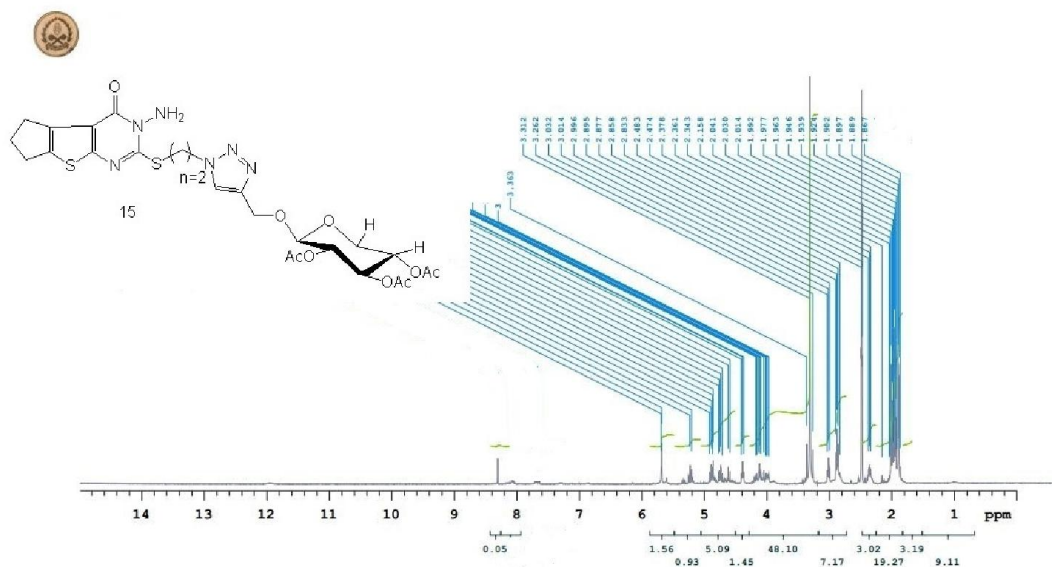

Plot date 2019-06-11

Fig 5: <sup>1</sup>H NMR of Compound 15

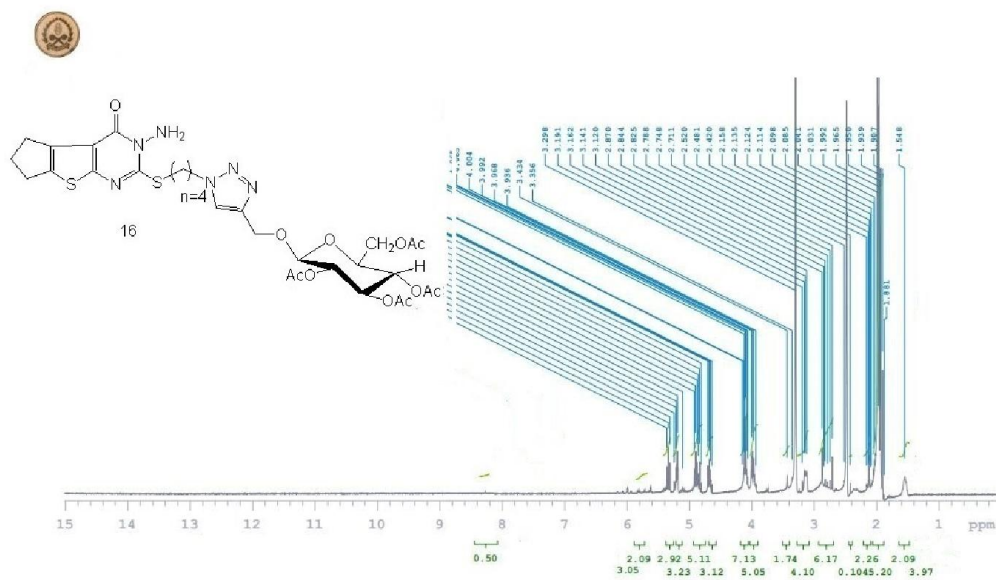

Plot date 2019-07-30

Fig 6: <sup>1</sup>H NMR of Compound 16

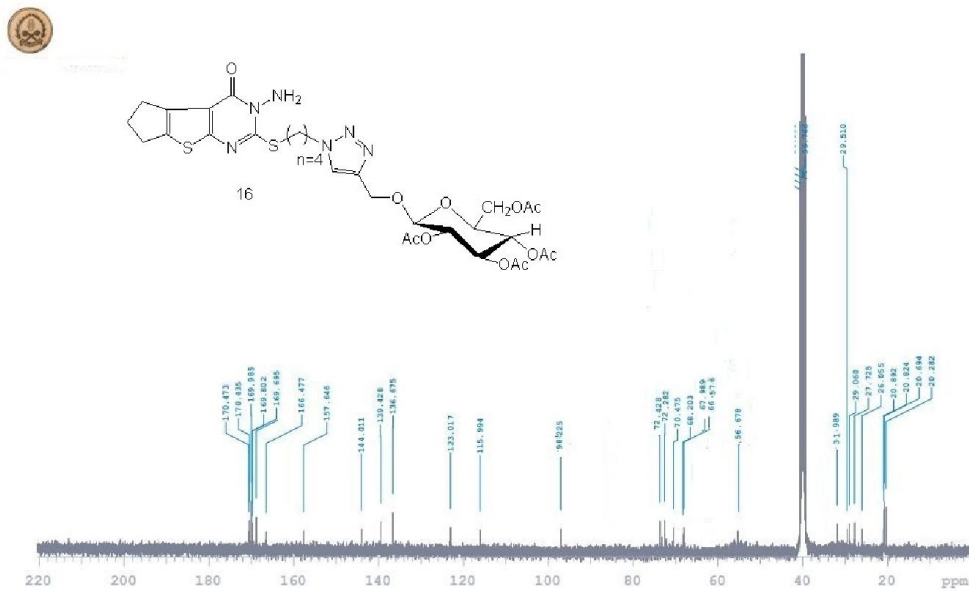

Plot date 2019-07-30

Fig 7:  $^{13}\text{C}$ NMR of Compound 16

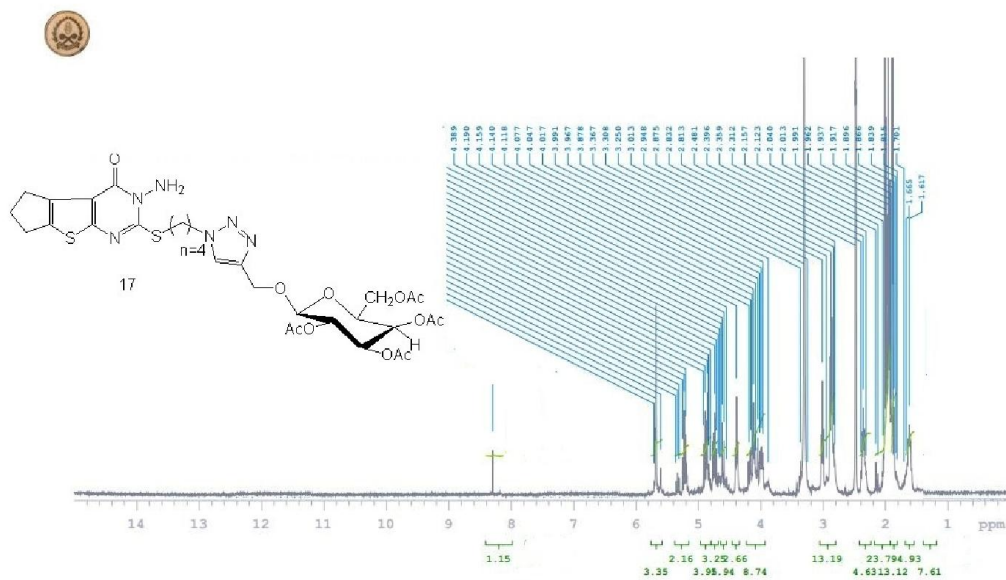

Plot date 2019-07-30

Fig 8:  $^1\text{H}$ NMR of Compound 17

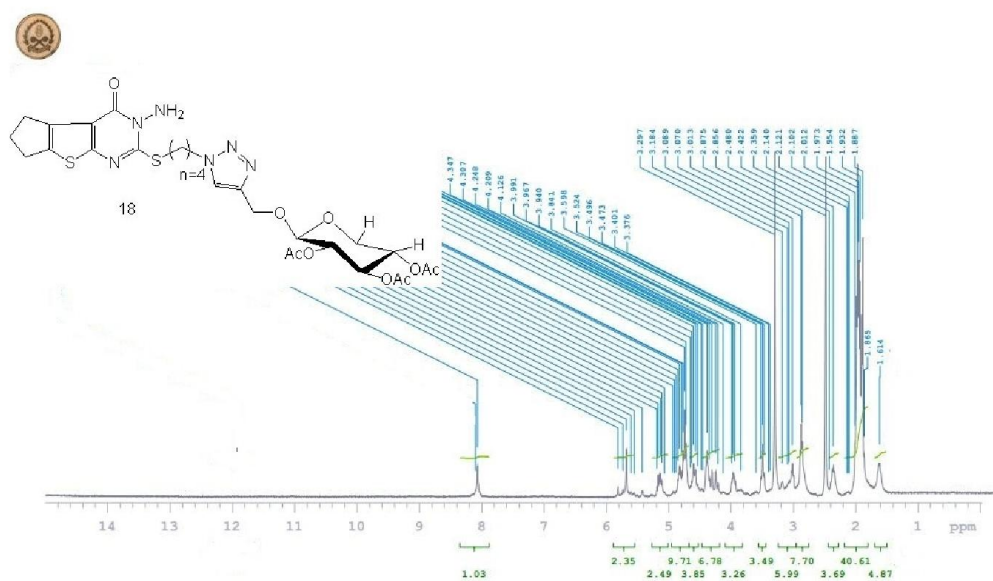

Plot date 2019-07-30

Fig 9: <sup>1</sup>H NMR of Compound **18**

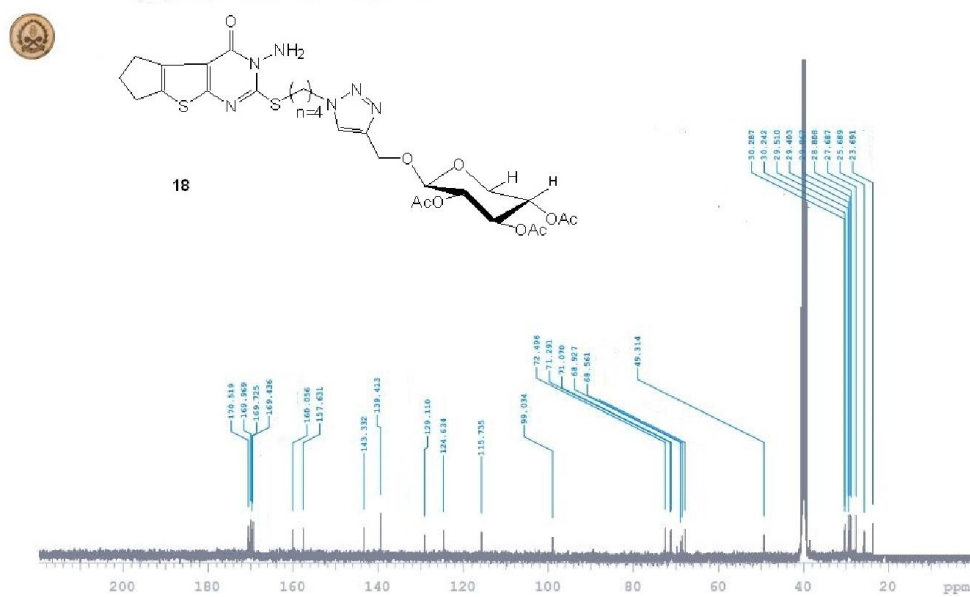

Supplement: IENZ_A_1871335_SM7165.pdf [file IENZ_A_1871335_SM7165.pdf]
